# Supplementary material for: Aqueous phase reforming and hydrodeoxygenation of ethylene glycol on Pt/SiO2–Al2O3: effects of surface acidity on product distribution
Source: Royal Society of Chemistry journal article supplement (doi:10.1039/c6ra09522d), 2016-01-01
Supplement: c6ra09522d1.pdf [file c6ra09522d1.pdf]

**Supplementary material**

**Aqueous phase reforming and hydrodeoxygenation of ethylene glycol on  
Pt/SiO<sub>2</sub>-Al<sub>2</sub>O<sub>3</sub>: effects of surface acidity to product distribution**

**Seongho Jeon<sup>a</sup>, Hyun-Seog Roh<sup>b</sup>, Dong Ju Moon<sup>c</sup>, Jong Wook Bae<sup>a,\*</sup>**

<sup>a</sup>School of Chemical Engineering, Sungkyunkwan University (SKKU), Suwon, Gyeonggi-do,  
440-746, Republic of Korea

<sup>b</sup>Department of Environmental Engineering, Yonsei University, 1 Yonseidae-gil, Wonju,  
Gangwon-do, 220-710, Republic of Korea

<sup>c</sup>Clean Energy Research Center, Korea Institute of Science and Technology (KIST), 136-791  
Seoul, Republic of Korea

Supplementary **Table S1** EG conversion and selectivity of aqueous phase reforming (APR) reaction at a similar conversion on the Pt/SA catalysts.

Supplementary **Table S2** represents the EG conversion and selectivity of aqueous phase reforming (APR) reaction with a different platinum content on the SA(0.1) support.

Supplementary **Figure S1** represents the conversion of EG to gaseous products with time on stream on the Pt/SA(0.1) for APR reaction at the reaction conditions of  $T = 250\text{ }^{\circ}\text{C}$ ,  $P = 4.5\text{ MPa}$  and weight hourly space velocity (WHSV) = 0.5, 1.0 and  $2.0\text{ h}^{-1}$  for 10 h with 0.3 g catalyst using 10wt%EG reactant in an aqueous solution.

Supplementary **Figure S2** represents the hydrocarbon productivity ( $\text{ml}/(\text{g}_{\text{cat}}\cdot\text{h})$ ) with time on stream on the Pt/SA catalysts during APR reaction at the reaction conditions of  $T = 250\text{ }^{\circ}\text{C}$ ,  $P = 4.5\text{ MPa}$  and weight hourly space velocity (WHSV) =  $2.0\text{ h}^{-1}$  for 20 h with 0.3 g catalyst using 10wt%EG reactant in an aqueous solution.

Supplementary **Figure S3** represents the hydrocarbon productivity ( $\text{ml}/(\text{g}_{\text{cat}}\cdot\text{h})$ ) with time on stream on the Pt/SA catalysts during APH reaction at the reaction conditions of  $T = 260\text{ }^{\circ}\text{C}$ ,  $P = 5.0\text{ MPa}$  and weight hourly space velocity (WHSV) =  $0.6\text{ h}^{-1}$  for 20 h with 0.5 g catalyst using 10wt%EG reactant in an aqueous solution.

Supplementary **Figure S4** represents the pore size distribution (PSD) measured from the desorption branch of  $\text{N}_2$  adsorption-desorption isotherms of the fresh Pt/SA catalysts.

Supplementary **Figure S5** represents the XRD patterns of the fresh Pt/SA catalysts.

Supplementary **Figure S6** represents the profiles for a coke deposition on the used Pt/SA catalysts after APR reaction for 20 h.

**Table S1.** EG conversion and selectivity of aqueous phase reforming (APR) reaction at a similar conversion on the Pt/SA catalysts

| Notation      | Time (h) | Conversion to gas (%) | Selectivity (%) |     |                 |     |
|---------------|----------|-----------------------|-----------------|-----|-----------------|-----|
|               |          |                       | H <sub>2</sub>  | CO  | CO <sub>2</sub> | HC  |
| Pt(5)/SA(0)   | 1        | 3.9                   | 72.8            | 1.9 | 24.2            | 1.1 |
| Pt(5)/SA(0.1) | 1        | 4.4                   | 74.3            | 0.0 | 24.3            | 1.4 |
| Pt(5)/SA(0.4) | 1        | 4.7                   | 70.9            | 2.5 | 24.1            | 2.5 |
| Pt(5)/SA(1.0) | 1        | 4.6                   | 68.3            | 3.2 | 24.3            | 4.3 |
| Pt(5)/SA(0)   | 3        | 16.1                  | 72.7            | 1.0 | 25.3            | 1.0 |
| Pt(5)/SA(0.1) | 2        | 14.5                  | 72.5            | 0.5 | 25.8            | 1.2 |
| Pt(5)/SA(0.4) | 4        | 15.5                  | 71.1            | 3.0 | 23.9            | 2.0 |
| Pt(5)/SA(1.0) | 7        | 15.7                  | 69.6            | 6.4 | 21.0            | 3.0 |

<sup>a</sup>The selectivity at a similar EG conversion on 5wt%platinum loaded on different molar ratio of SA support was measured at the reaction conditions of T = 250 °C and P = 4.5 MPa, and weight hourly space velocity (WHSV) = 2.0 h<sup>-1</sup> at steady-state after 20 h reaction using 0.3 g catalyst with 10wt% EG reactant in an aqueous solution.

**Table S2.** EG conversion and selectivity of aqueous phase reforming (APR) reaction with a different platinum content on the SA(0.1) support

| Notation      | Conversion to gases (%) | H <sub>2</sub> production rate (mLg <sub>cat</sub> <sup>-1</sup> h <sup>-1</sup> ) | Selectivity (%) |     |                 |     | HC selectivity (%) |                |
|---------------|-------------------------|------------------------------------------------------------------------------------|-----------------|-----|-----------------|-----|--------------------|----------------|
|               |                         |                                                                                    | H <sub>2</sub>  | CO  | CO <sub>2</sub> | HC  | C <sub>1</sub>     | C <sub>2</sub> |
| Pt(1)/SA(0.1) | 19.45                   | 817.1                                                                              | 74.4            | 0.4 | 24.6            | 0.6 | 63.8               | 36.2           |
| Pt(3)/SA(0.1) | 41.89                   | 1698.6                                                                             | 73.8            | 0.0 | 25.2            | 1.0 | 57.2               | 42.8           |
| Pt(5)/SA(0.1) | 43.39                   | 1691.4                                                                             | 74.0            | 0.8 | 25.4            | 0.9 | 36.2               | 63.8           |
| Pt(7)/SA(0.1) | 45.25                   | 1410.2                                                                             | 68.4            | 0   | 26.7            | 5.0 | 88.6               | 11.4           |

<sup>a</sup>The different amount of platinum metal was impregnated on the SA(0.1) support from 3 to 7wt%Pt, and catalytic activity and selectivity were measured at the reaction conditions of T = 250 °C and P = 4.5 MPa, and weight hourly space velocity (WHSV) = 2.0 h<sup>-1</sup> for around 20 h using 0.3 g catalyst with 10wt% EG reactant in an aqueous solution.

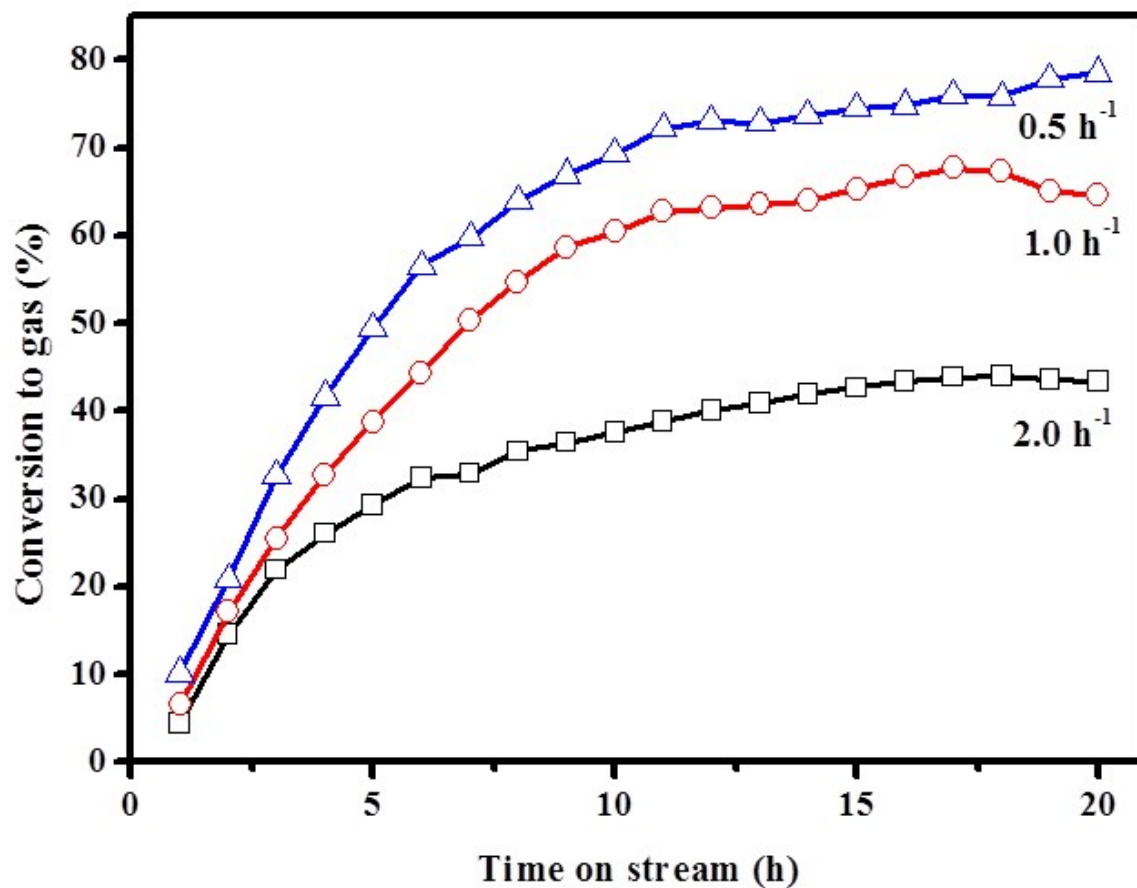

**Figure S1.** Conversion of EG to gaseous products with time on stream on the Pt/SA(0.1) for APR reaction at the reaction conditions of  $T = 250\text{ }^{\circ}\text{C}$ ,  $P = 4.5\text{ MPa}$  and weight hourly space velocity (WHSV) = 0.5, 1.0 and 2.0  $\text{h}^{-1}$  for 10 h with 0.3 g catalyst using 10wt%EG reactant in an aqueous solution

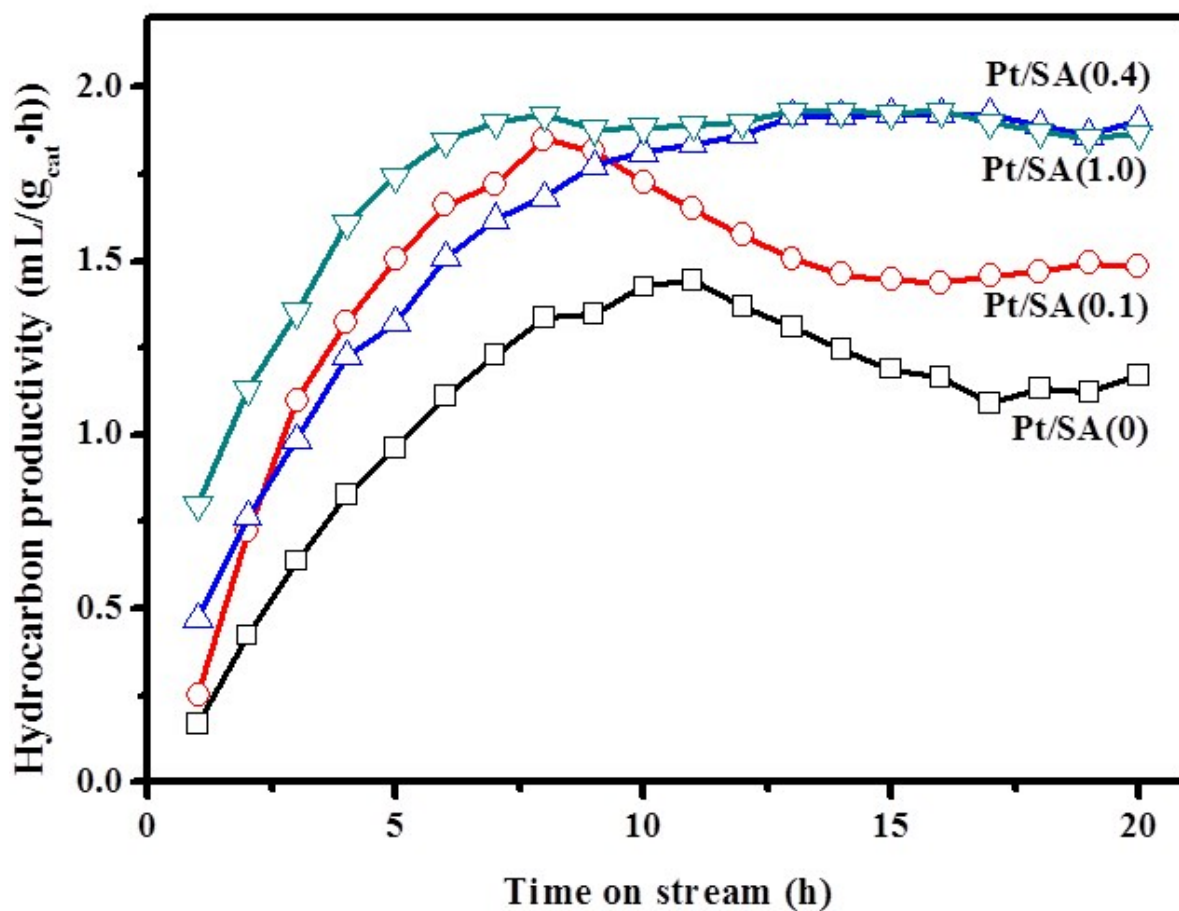

**Figure S2.** Hydrocarbon productivity (ml/(g<sub>cat</sub>·h)) with time on stream on the Pt/SA catalysts during APR reaction at the reaction conditions of T = 250 °C, P = 4.5 MPa and weight hourly space velocity (WHSV) = 2.0 h<sup>-1</sup> for 20 h with 0.3 g catalyst using 10wt%EG reactant in an aqueous solution

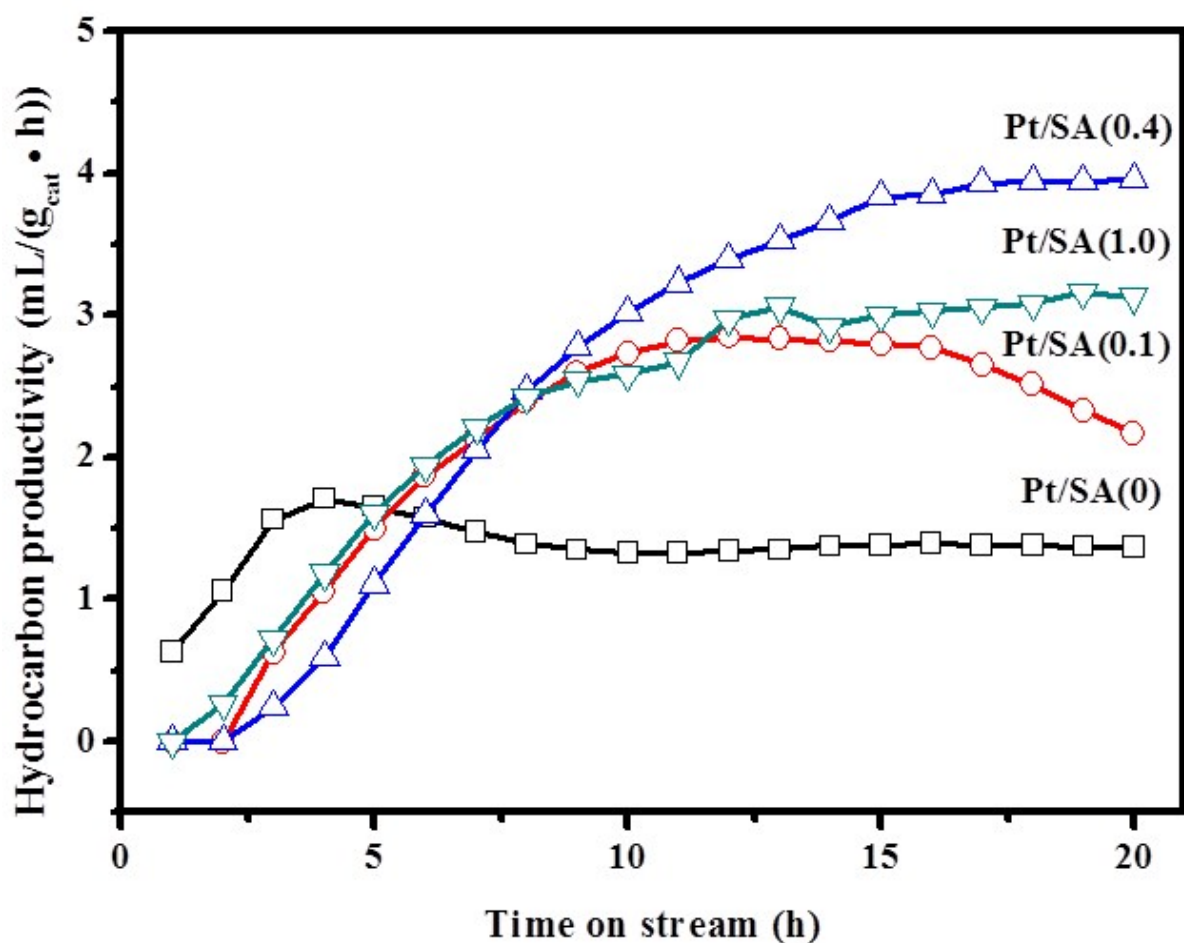

**Figure S3.** Hydrocarbon productivity (ml/(g<sub>cat</sub> · h)) with time on stream on the Pt/SA catalysts during APH reaction at the reaction conditions of T = 260 °C, P = 5.0 MPa and weight hourly space velocity (WHSV) = 0.6 h<sup>-1</sup> for 20 h with 0.5 g catalyst using 10wt%EG reactant in an aqueous solution

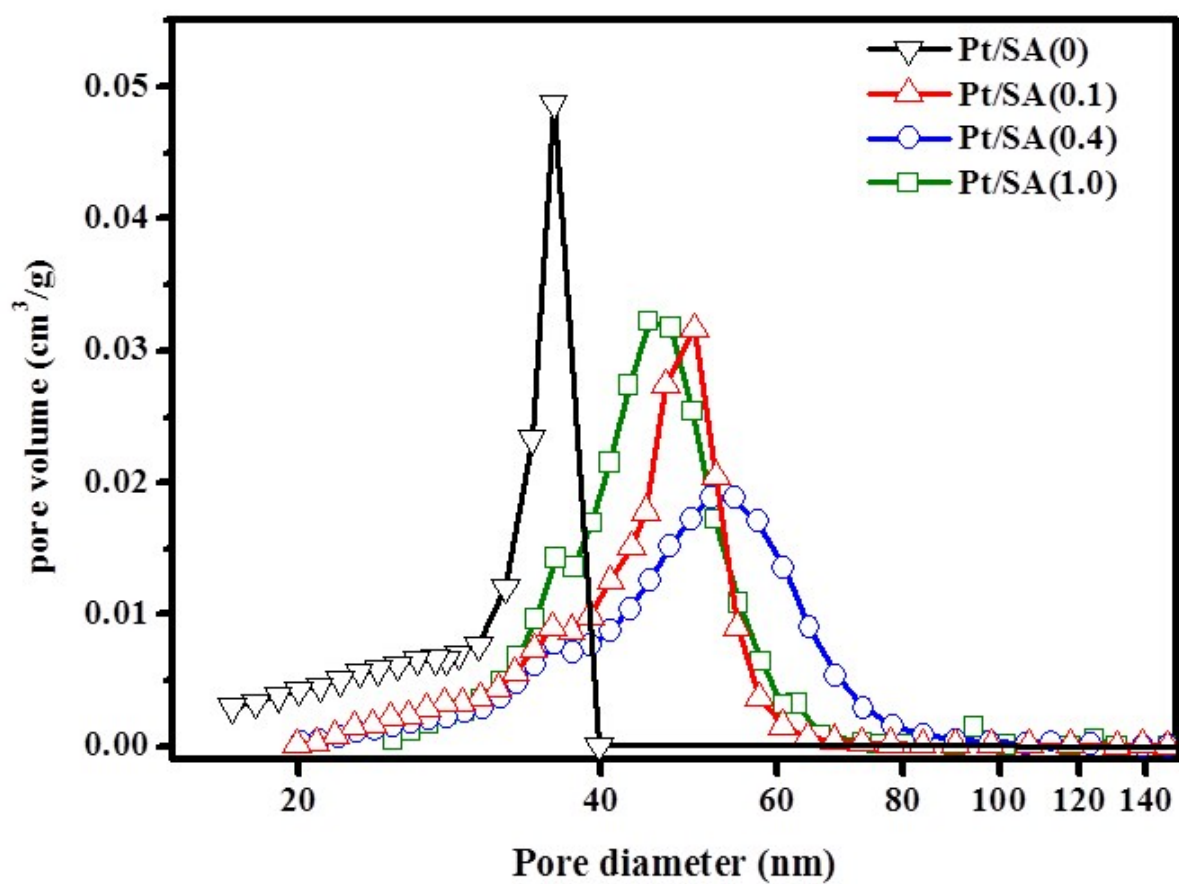

**Figure S4.** Pore size distribution (PSD) measured from the desorption branch of N<sub>2</sub> adsorption-desorption isotherms of the fresh Pt/SA catalysts



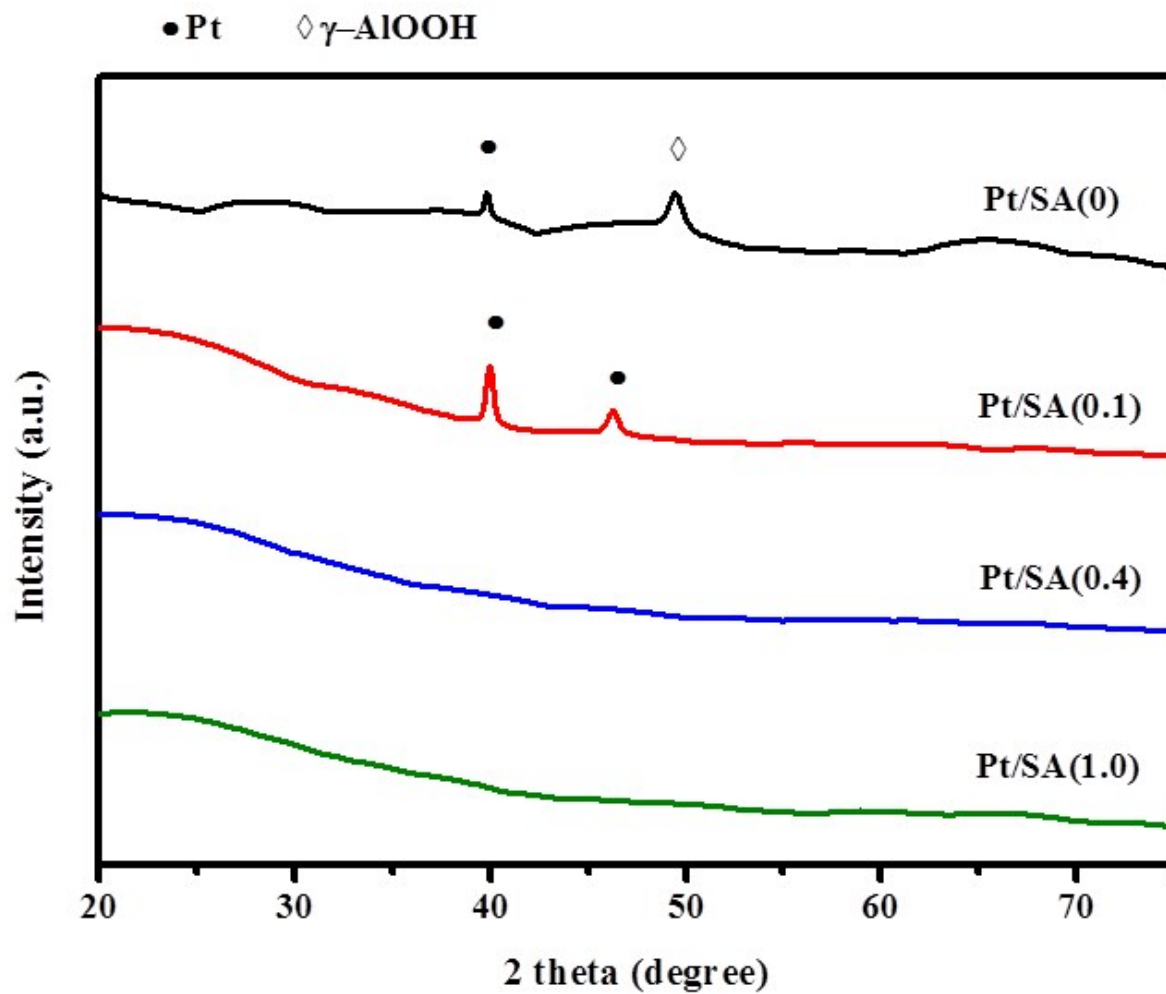

Figure S5. XRD patterns of the fresh Pt/SA catalysts

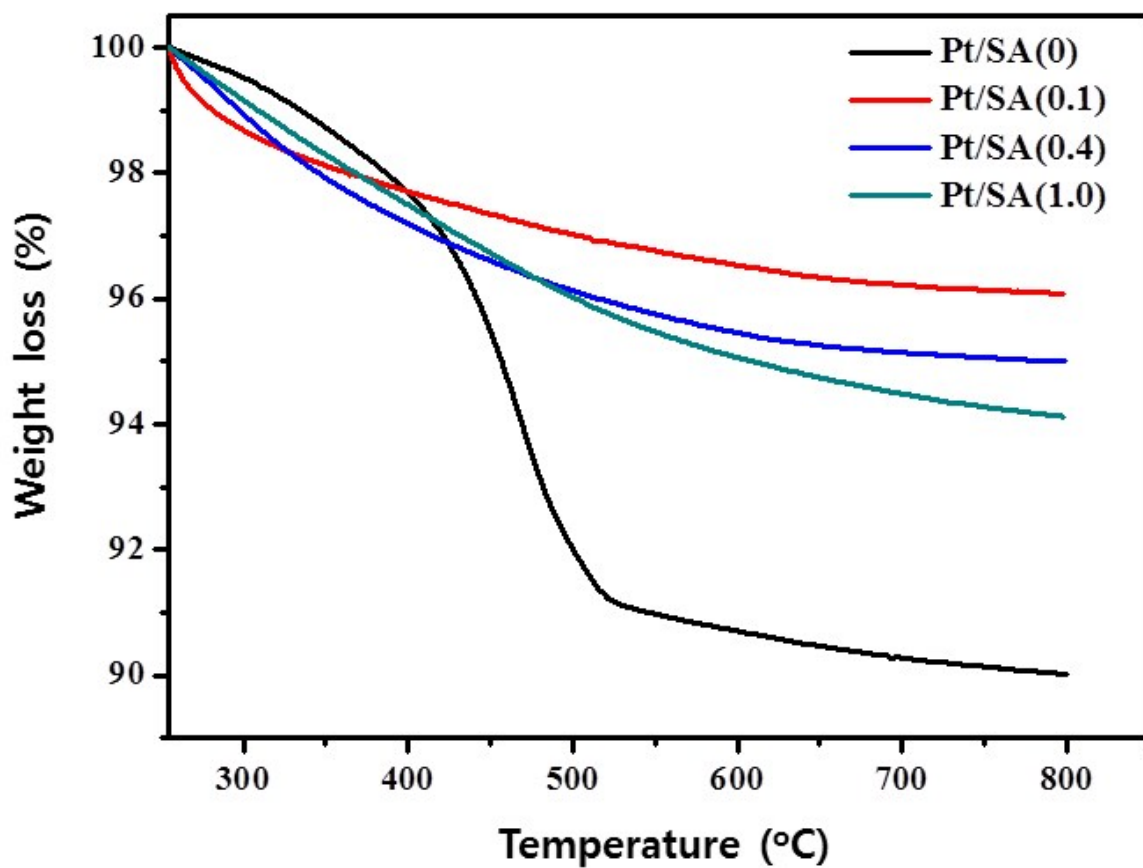

**Figure S6.** TGA profiles for a coke deposition on the used Pt/SA catalysts after APR reaction for 20 h
